# Supplementary material for: Redox inactive ion meliorated BaCo0.4Fe0.4Zr0.1Y0.1O3−δ perovskite oxides as efficient electrocatalysts for the oxygen evolution reaction
Source: Royal Society of Chemistry journal article supplement (doi:10.1039/c8ta05599h), 2018-01-01
Supplement: c8ta05599h1.pdf [file c8ta05599h1.pdf]

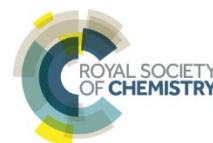

## Supporting Information

### Redox Inactive Ions Meliorated $\text{BaCo}_{0.4}\text{Fe}_{0.4}\text{Zr}_{0.1}\text{Y}_{0.1}\text{O}_{3-\delta}$ Perovskite Oxides as Efficient Electrocatalysts for Oxygen Evolution Reaction

Xiangnan Li <sup>a,d,†</sup>, Jie Zhang <sup>a,†</sup>, Qi Feng <sup>a</sup>, Chunying Pu <sup>b</sup>, Luo Zheng Zhang <sup>a</sup>, Manman Hu <sup>a</sup>, Xianrong Zhou <sup>a</sup>, Xiongwei Zhong <sup>a</sup>, Wendi Yi <sup>a</sup>, Jun Tang <sup>a</sup>, Zhiwei Li <sup>c</sup>, Xingzhong Zhao <sup>d</sup>, Hui Li <sup>a</sup>, Baomin Xu <sup>a,\*</sup>

<sup>a</sup>Department of Materials Science and Engineering, Southern University of Science and Technology, Shenzhen, Guangdong Province 518055, China

<sup>b</sup>College of Physics and Electronic Engineering, Nanyang Normal University, Nanyang, Henan Province 473061, China

<sup>c</sup>School of Physical Science and Technology, Lanzhou University, Lanzhou, Gansu Province 730000, China

<sup>d</sup>Department of Physics, Wuhan University, Wuhan, Hubei Province 430072, China

<sup>†</sup> These authors contributed equally.

\* Corresponding author, E-mail: xubm@sustc.edu.cn (Baomin Xu)

## Experimental Section

*Catalysts synthesis:*  $\text{BaCo}_{0.5-x}\text{Fe}_{0.5-x}\text{Zr}_x\text{Y}_x\text{O}_{3-\delta}$  ( $\text{BCF}(\text{ZY})_x$ ,  $x = 0.05-0.10$ ) and  $\text{Ba}_{0.5}\text{Sr}_{0.5}\text{Co}_{0.8}\text{Fe}_{0.2}\text{O}_{3-\delta}$  (BSCF) oxides were synthesized by a combined EDTA-citrate complexing sol-gel method. Here taking  $\text{BCF}(\text{ZY})_{0.1}$  as an example, stoichiometric amounts of barium nitrate (Aladdin,  $\geq 99.0\%$ ), cobalt (II) nitrate (Aladdin,  $\geq 99.0\%$ ), iron (III) nitrate (Aladdin,  $\geq 98.0\%$ ), zirconium (IV) nitrate (Aladdin,  $\geq 99.0\%$ ) and yttrium (III) nitrate (Aladdin,  $\geq 99.0\%$ ) were weighed, dissolved in deionized water and then added into EDTA- $\text{NH}_3 \cdot \text{H}_2\text{O}$  solution ( $\text{pH} \approx 9$ ) with stirring to form an aqueous solution. Then citric acid- $\text{NH}_3 \cdot \text{H}_2\text{O}$  solution ( $\text{pH} \approx 9$ ) was introduced, with the molar ratio of 1:1:2 for EDTA acid: total metal ions: citric acid. The mixed solution was heated at 80 °C and 150 °C in sequence to obtain a dark dry foam-structure precursor. The precursor was decomposed in a muffle furnace, followed by calcinations at 600 °C for 5 h and 1050 °C for 10 h in air to yield the desired powders. The commercial catalyst of  $\text{IrO}_2$  was purchased from SangLaiTe for comparison.

*Physicochemical characterization:* The crystal structure of as-synthesized  $\text{BaCo}_{0.5-x}\text{Fe}_{0.5-x}\text{Zr}_x\text{Y}_x\text{O}_{3-\delta}$  ( $\text{BCF}(\text{ZY})_x$ ,  $x = 0.05-0.10$ ) powders was characterized by X-ray diffraction measurement (XRD, D/MAX-2400 Rigaku, TOKYO) at room temperature with step size of  $0.02^\circ$  in  $2\theta$  over the scanning angular range of  $20^\circ-80^\circ$ . To get more accurate details of crystal structures, zeropoint correction of XRD patterns was carried out based on the X-ray diffraction theory. Then, Rietveld method was used for structure refinement employing the Materials Studio program of reflex plus modules. The morphologies of the catalysts were observed using a field-emission scanning electron microscope (SEM, TESCAN MIRA3). To better observe the particle size and micro-structure, certain amount of catalysts were dispersed into tetrahydrofuran solution by supersonic and then dripped on the clean Cu foil under a reductive heat treatment. The catalysts morphology and structure were further analyzed by

transmission electron microscopy (TEM, Tecnai F30). The cross-sectional TEM samples of catalyst particles were thinned initially by a typical focused ion beam (FIB, FEI Helios 600i) technique and were additionally treated by a low-energy Ar-ion milling system to remove the amorphous layer. To minimize the surface contamination from other foreign impurities and avoid the Ga ion beam damage during the FIB process, the surface of the particles was first coated with sputtered carbon before FIB. The specific surface areas of the catalysts were estimated via Brunauer Emmet Teller (BET, Tristar II plus, Micromeritics) method under nitrogen atmosphere using physisorption analyzer. Oxygen content of the as-synthesized BCF(ZY)<sub>0.1</sub> sample was determined by iodometric titrations at room temperature with seven parallel analyses to reduce the measurement error. The chemical compositions and surface element sates were determined by X-ray photoelectron spectroscopy (PHI 5000 VersaProbe II). Mössbauer spectroscopy of the BCF(ZY)<sub>0.1</sub> was recorded using a conventional constant acceleration spectrometer (Wissel, Germany) with a  $\gamma$ -ray source of 25 mCi<sup>57</sup>Co in a palladium matrix moving at room temperature. The absorber was kept static in a temperature-controllable cryostat. All isomer shifts were quoted relative to  $\alpha$ -Fe at room temperature. The oxygen desorption properties were evaluated using oxygen temperature programmed desorption (O<sub>2</sub>-TPD, Auto Chem II 2920, Micromeritics). Approximately 0.2 g of each sample was heated in a U-type quartz tube to 250 °C with a heating rate of 10 °C min<sup>-1</sup> under pure Ar, and kept at this temperature for 2h. After cooling the sample to room temperature, adsorption of O<sub>2</sub> was carried out in flowing O<sub>2</sub> for 1 hour. For comparison, corresponding blank test without adsorption of O<sub>2</sub> was conducted under the same test process. The gas was then switched to pure Ar until the baseline was stable. After these processes finished, the O<sub>2</sub>-TPD measurement was performed up to 700 °C with a ramp of 10 °C min<sup>-1</sup> in flowing pure Ar (15 ml min<sup>-1</sup>). The outlet gases were analyzed by a mass spectrometer to monitor the oxygen concentrations.

*Electrochemical measurement:* The electrochemical activity of the investigated catalyst was evaluated by using the typical thin film rotating disk electrode (TFRDE) method, which involved the preparation of the catalyst ink, the formation of the thin film of catalyst on the RDE, and the electrochemical measurements carried out in a typical three-electrode electrochemical cell connected to an electrochemical workstation.

*Preparation of the catalyst ink:* Briefly, the catalyst ink was prepared by sonicating a mixture of 5.0 mg of the catalyst, 1.0 mg of acetylene black (AB) carbon, and 33  $\mu\text{L}$  of  $\text{K}^+$  exchanged Nafion solution in the solvent containing 500  $\mu\text{L}$  2-methoxyl ethanol and 467  $\mu\text{L}$  tetrahydrofuran for 1 h. The AB carbon was treated in nitric acid overnight at 80  $^{\circ}\text{C}$ , and  $\text{K}^+$  exchanged Nafion solution was a mixture of 2/1 volume ratio of Nafion solution (5 wt%) and 0.1 M KOH.

*Preparing thin film of the catalyst on the RDE:* 10  $\mu\text{L}$  of the catalyst ink was dropped on the glassy carbon RDE (0.196  $\text{cm}^2$  area) polished by 50 nm alumina slurry and rinsed by sonicating in pure water. Then the RDE was rotated at 700 rpm until the film was dry (about 30 min), yielding a catalyst mass loading of 0.255  $\text{mg}_{\text{oxide}} \text{ cm}_{\text{disk}}^{-2}$ . BCF(ZY)<sub>x</sub>, BSCF and  $\text{IrO}_2$  have the same mass loading in the TFRDE.

*Electrochemical systems:* Electrochemical measurements were conducted in a typical three-electrode electrochemical cell connected to an electrochemical workstation (CHI 760) and a RDE system (Pine instrument company, USA) at room temperature. A graphite rod electrode was used as the counter electrode. The reference electrode was a  $\text{Hg}|\text{HgO}$  (0.1 M KOH) electrode, which was calibrated with respect to a reversible hydrogen electrode in 0.1 M KOH. The electrolyte was 0.1 M KOH aqueous solution (Acros, 99.98%), which was  $\text{O}_2$ -saturated by bubbling  $\text{O}_2$  into it for more than 30 min prior to test and maintained under  $\text{O}_2$  atmosphere throughout.

*Measurement procedure:* Before all the measurements, the catalyst was electrochemically activated via cyclic voltammetry in the potential range of 0.23 to 0.9 V (versus Hg|HgO) at 100 mV s<sup>-1</sup> for 40 cycles with a rotating rate of 1600 rpm. The cyclic voltammetry measurement of OER activity was performed at 10 mV s<sup>-1</sup> and 1600 rpm. The CV curve was capacity corrected by averaging the forward and reverse currents, and ohmic resistance corrected according to the Equation:  $E_{iR\text{-corrected}} = E - iR$ , where  $i$  is the current, and  $R$  is the ohmic resistance (~45  $\Omega$ ) from electrolyte measured via electrochemical impedance spectroscopy. The chronopotentiometry was carried out at 10 mA cm<sub>disk</sub><sup>-2</sup> and 1600 rpm for 2h. Electrochemical impedance spectroscopy measurement was performed at 0.68 V vs Hg|HgO between 10 KHz to 100 mHz with an amplitude of 10 mV.

*An anion exchange membrane (AEM) water electrolysis cell preparation:* Membrane electrode assemblies (MEAs) were prepared by using the catalysts coated on substrate (CCS) method, as follows. Pt/C (40 wt%, Johnson matthey, HiSPECTM 4000) was used as hydrogen evolution reaction (HER) electrocatalyst for the cathode, and BCF(ZY)<sub>0.1</sub> was used as oxygen evolution reaction (OER) electrocatalyst for the anode. A201 membrane (Tokuyama Corporation, Japan) with a thickness of 28  $\mu$ m was used as anion exchange membrane (AEM). The catalyst layer was prepared from a homogenous ink comprising catalyst, isopropyl alcohol, and alkaline ionomer (xQAPS, 2 wt%, WHU) solution. The electrocatalysts loading were 6.37 mg cm<sup>-2</sup> BCF(ZY)<sub>0.1</sub> and 1.5 mg cm<sup>-2</sup> Pt, respectively. The ionomer content in the catalyst layer was approximately 15% for the hydrogen side and the oxygen side. The electrode catalyst ink was sprayed onto microporous carbon paper (TGPH-90, Toray Inc., Japan) using an air spray gun (Iwata, Japan). Both the gas diffusion electrodes (GDEs) were dried at 40 °C for 12 h. The membrane was sandwiched between the anode and cathode GDEs. The MEA was housed between two titanium bipolar plates with flow channels. The entire cell was mechanically tightened to achieve intimate contact between the MEA components. The effective area of the MEA was 2.25 cm<sup>2</sup>. A preheated 0.1 M KOH solution

was used as electrolyte for water electrolysis. The electrolyte fed in 30 ml min<sup>-1</sup> to the anode of the cells and was circulated, from a reservoir, through the anode side by a peristaltic pump. Experiments were carried out at 50 °C.

*Computational section:* The underlying ab initio structure relaxations were performed in the framework of density functional theory within the generalized gradient approximation<sup>[1]</sup> as implemented in the VASP code.<sup>[2, 3]</sup> The electron-ion interaction is described by pseudopotentials built within the projector augmented wave approximation with 2s<sup>2</sup>2p<sup>4</sup>, 3d<sup>7</sup>4s<sup>1</sup>, 3d<sup>8</sup>4s<sup>1</sup>, 4s<sup>2</sup>4p<sup>6</sup>5s<sup>2</sup>4d<sup>1</sup>, 4s<sup>2</sup>4p<sup>6</sup>5s<sup>2</sup>4d<sup>2</sup> and 5s<sup>2</sup>5p<sup>6</sup>6s<sup>2</sup> valence electrons for O, Fe, Co, Y, Zr and Ba atoms, respectively.<sup>[3, 4]</sup> The energy cut-off 400 eV and appropriate Monkhorst-Pack k-meshes with grid spacing of 2 $\pi$ ×0.03 Å<sup>-1</sup> in 100 atoms lattice are found to provide sufficient precision in calculating total energy and force for the exchange correlation formalisms. This usually gives total energies well converged within ~1× 10<sup>-6</sup> eV/atom. The formation energy of V<sub>o</sub><sup>••</sup> in Ba<sub>20</sub>Co<sub>8</sub>Fe<sub>8</sub>Zr<sub>2</sub>Y<sub>2</sub>O<sub>60</sub> is calculated by the following Equation:<sup>[5]</sup>

$$\Delta E_{f, vac} = E_{defective(V_o^{••})} + \frac{1}{2}E_{O_2} - E_{perfect}$$

Where  $E_{defective(V_o^{••})}$ ,  $E_{perfect}$ , and  $E_{O_2}$  are the calculated total energy of V<sub>o</sub><sup>••</sup>-containing Ba<sub>20</sub>Co<sub>8</sub>Fe<sub>8</sub>Zr<sub>2</sub>Y<sub>2</sub>O<sub>60</sub>, perfect lattice structure Ba<sub>20</sub>Co<sub>8</sub>Fe<sub>8</sub>Zr<sub>2</sub>Y<sub>2</sub>O<sub>60</sub>, and the chemical potential of an O<sub>2</sub> molecule. In this work, we use a large 100-atom cell with a quasirandom distribution of Fe/Co/Zr/Y cations on B site.

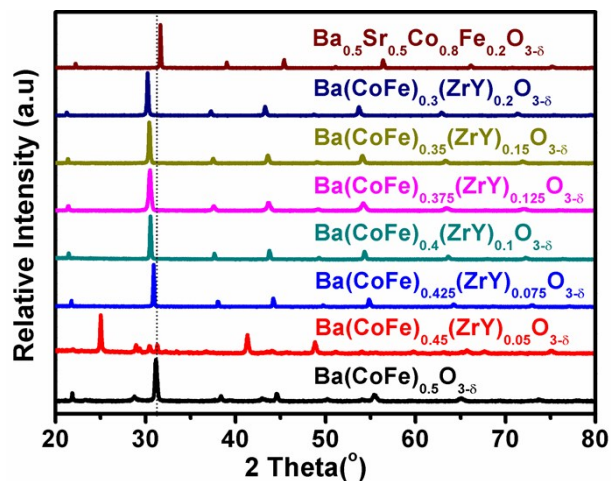

Figure S1. XRD pattern of as-synthesized  $\text{BaCo}_{0.5-x}\text{Fe}_{0.5-x}\text{Zr}_x\text{Y}_x\text{O}_{3-\delta}$  ( $x = 0-0.2$ ) and  $\text{Ba}_{0.5}\text{Sr}_{0.5}\text{Co}_{0.8}\text{Fe}_{0.2}\text{O}_{3-\delta}$  (BSCF).

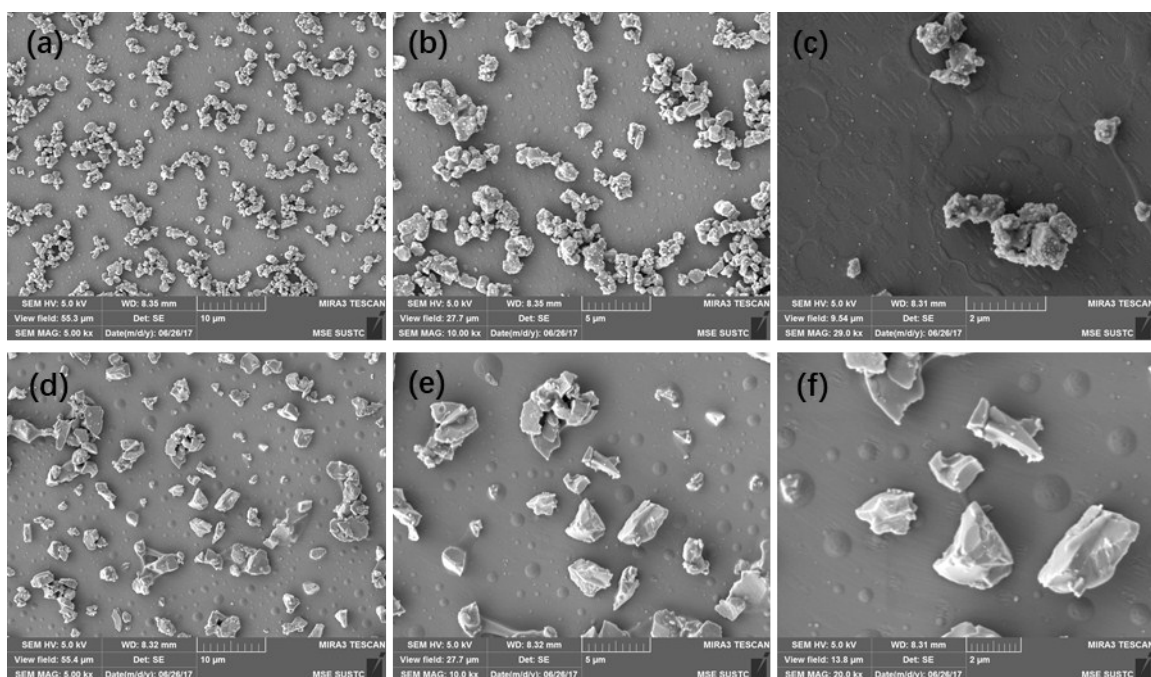

Figure S2. SEM images of as-synthesized  $\text{BCF}(\text{ZY})_{0.1}$  (a-c) and BSCF(d-f) powders at various resolutions.

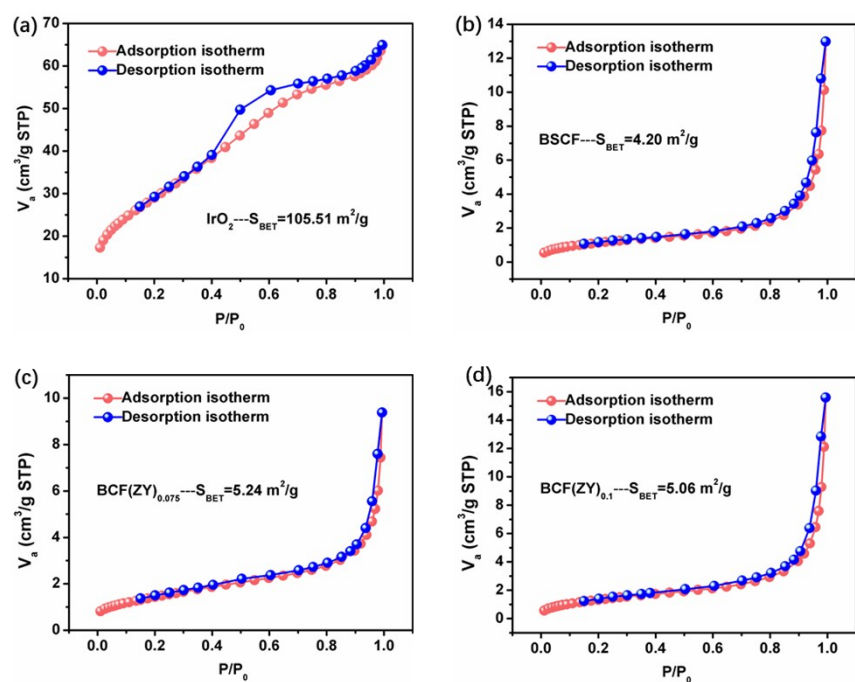

Figure S3. N<sub>2</sub> adsorption-desorption isotherm curve of IrO<sub>2</sub> (a), BSCF (b), BCF(ZY)<sub>0.075</sub> (c) and BCF(ZY)<sub>0.1</sub>.

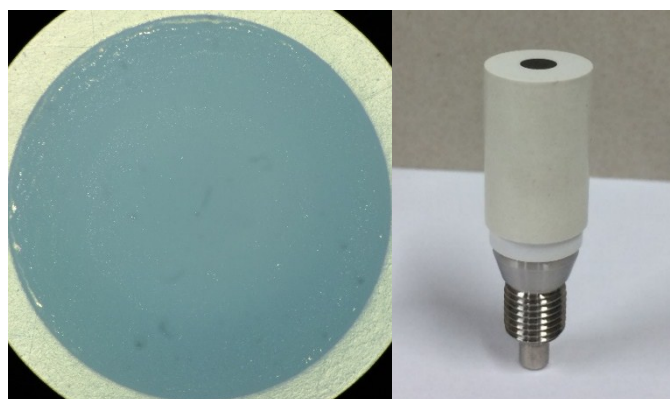

Figure S4. Observed film feature on RDE by using a microscopy.



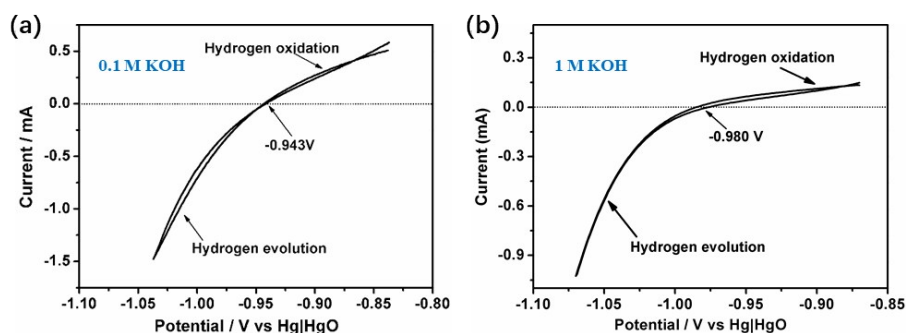

Figure S5. CV curve of Pt mesh working electrode at a scan rate of  $1 \text{ mV s}^{-1}$  in the ultrahigh purity  $\text{H}_2$ -saturated (a)  $0.1 \text{ M KOH}$  and (b)  $1 \text{ M KOH}$  solution for RHE calibration of the  $\text{Hg}|\text{HgO}$  electrode (Calibrate the RE with RHE).

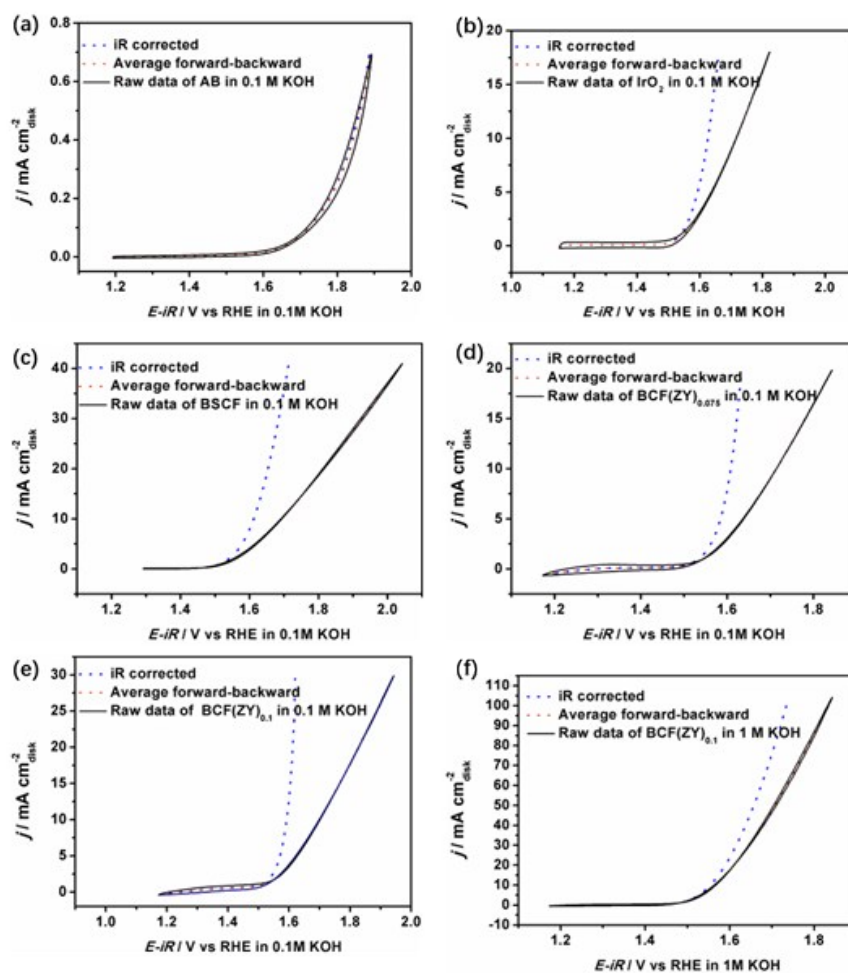

Figure S6. Comparison between CVs with and without iR and capacity correction (Capacitive and ohmic corrections of the as-measured CV curve ( $10 \text{ mV s}^{-1}$ ) of conductive acetylene black (AB) (a),  $\text{IrO}_2$  (b), BSCF (c),  $\text{BCF}(\text{ZY})_{0.075}$  (d) and  $\text{BCF}(\text{ZY})_{0.1}$  (e-f).

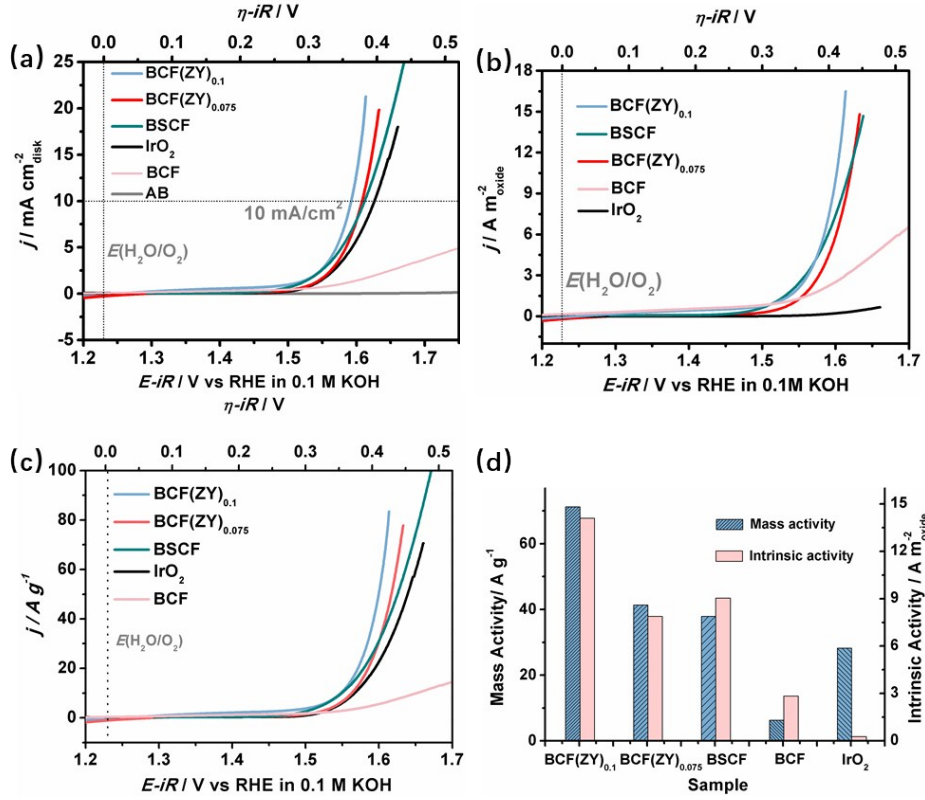

Fig S7. (a) Ohmic and capacitive corrected voltammograms of Ba(CoFe)<sub>0.5</sub>O<sub>3- $\delta$</sub>  (BCF), Ba(CoFe)<sub>0.425</sub>(ZrY)<sub>0.075</sub>O<sub>3- $\delta$</sub>  (BCF(ZY)<sub>0.075</sub>), Ba(CoFe)<sub>0.4</sub>(ZrY)<sub>0.1</sub>O<sub>3- $\delta$</sub>  (BCF(ZY)<sub>0.1</sub>), Ba<sub>0.5</sub>Sr<sub>0.5</sub>Co<sub>0.8</sub>Fe<sub>0.2</sub>O<sub>3- $\delta$</sub>  (BSCF) and IrO<sub>2</sub> at 10 mV cm<sup>-2</sup> and 1600 rpm. The background OER activity of a thin-film Nafion-bonded acetylene black (AB) thin film electrode is shown for reference. These curves are averaged from three independent measurements. (b) Mass activity curves of BCF, BCF(ZY)<sub>0.075</sub>, BCF(ZY)<sub>0.1</sub>, BSCF and IrO<sub>2</sub>, the current is normalized by the oxides mass loading. (c) Intrinsic OER activity curves of BCF, BCF(ZY)<sub>0.075</sub>, BCF(ZY)<sub>0.1</sub>, BSCF and IrO<sub>2</sub>, the current is normalized by the BET surface area of the oxides. (d) The comparison of intrinsic OER activity and mass activity of BCF, BCF(ZY)<sub>0.075</sub>, BCF(ZY)<sub>0.1</sub>, BSCF and IrO<sub>2</sub>, catalysts at an overpotential of  $\eta=0.38\text{V}$  in 0.1 M KOH.

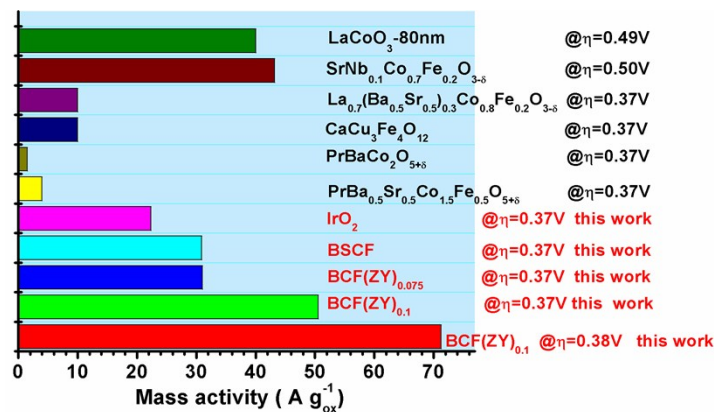

Figure S8. The comparison of mass OER activity of BCF(ZY)<sub>0.1</sub> with recently reported advanced representative active OER electrocatalysts and IrO<sub>2</sub> supported on glass carbon electrode (GCE) in alkaline solutions.

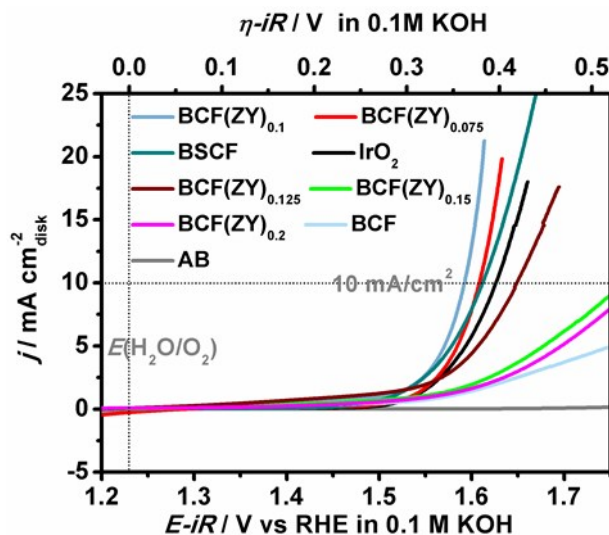

Figure S9.. Ohmic and capacitive corrected voltammograms of BaCo<sub>0.5-x</sub>Fe<sub>0.5-x</sub>Zr<sub>x</sub>Y<sub>x</sub>O<sub>3-δ</sub> (x = 0-0.2) , Ba<sub>0.5</sub>Sr<sub>0.5</sub>Co<sub>0.8</sub>Fe<sub>0.2</sub>O<sub>3-δ</sub> (BSCF), and IrO<sub>2</sub> at 10 mV cm<sup>-2</sup> and 1600 rpm.

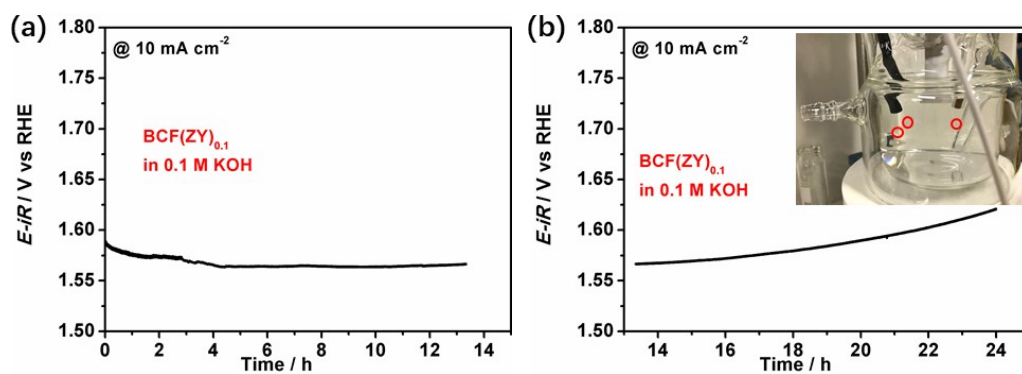

Figure S10. Chronopotentiometry (CP) measurement of the BCF(ZY)<sub>0.1</sub> catalysts on the RDE at a constant current density of  $10 \text{ mA cm}_{\text{disk}}^{-2}$  in O<sub>2</sub>-saturated 0.1 M KOH.

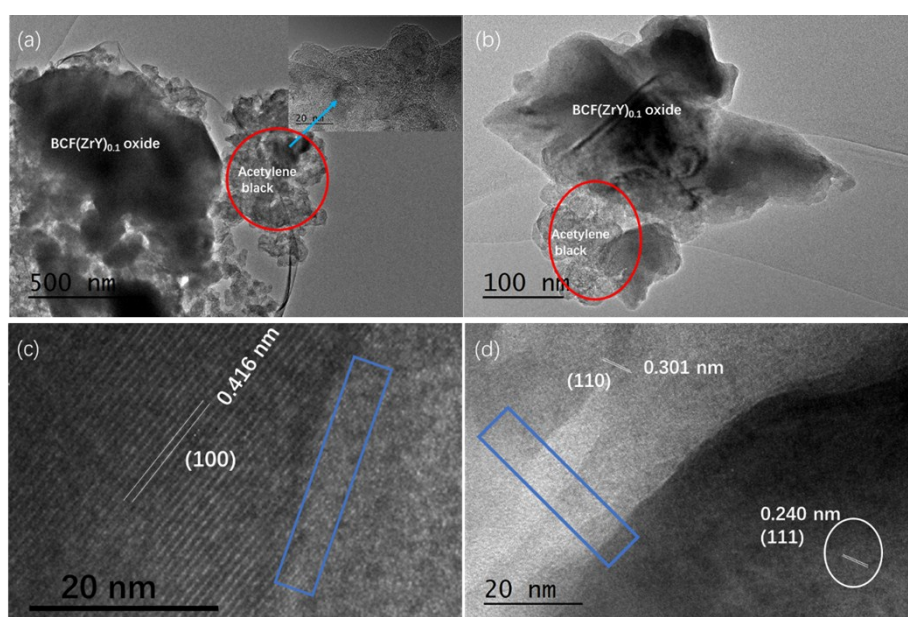

Figure S11. TEM (a-b) and HRTEM (c-d) images of BCF(ZY)<sub>0.1</sub> catalysts after Chronopotentiometry (CP) measurement for 24 h.

Table S1. Crystalline interplanar spacing of BCF(ZY)<sub>0.1</sub> oxide before (from XRD) and after (from TEM) CP test for 24 h

|       | Before CP test<br>(from XRD) | After CP test<br>(from TEM) |
|-------|------------------------------|-----------------------------|
| (100) | 0.411                        | 0.416                       |
| (110) | 0.291                        | 0.301                       |
| (111) | 0.237                        | 0.240                       |

Table S2. Comparison of OER activity of BCF(ZY)<sub>0.1</sub> with recently reported advanced representative active OER electrocatalysts supported on glass carbon electrode (GCE) in alkaline solutions.

| Name                                                                                     | Electrolyte    | Mass loading<br>mg <sub>oxide</sub> /cm <sup>2</sup> <sub>disk</sub> | Tafel slope<br>(mV/dec)<br>(disk) | potential<br>at 10<br>mA/cm <sup>2</sup> | Overpotential at<br>10 mA /cm <sup>2</sup> | reference                                       |
|------------------------------------------------------------------------------------------|----------------|----------------------------------------------------------------------|-----------------------------------|------------------------------------------|--------------------------------------------|-------------------------------------------------|
| BCF(ZY) <sub>0.1</sub>                                                                   | 0.1 M KOH      | 0.255                                                                | 69                                | 1.592                                    | 0.362                                      | This work                                       |
| <b>BCF(ZY)<sub>0.1</sub></b>                                                             | <b>1 M KOH</b> | <b>0.255</b>                                                         | <b>66</b>                         | <b>1.554</b>                             | <b>0.324</b>                               | <b>This work</b>                                |
| Ba <sub>0.5</sub> Sr <sub>0.5</sub> Co <sub>0.8</sub> Fe <sub>0.2</sub> O <sub>3-δ</sub> | 0.1 M KOH      | 0.255                                                                | 80                                | 1.612                                    | 0.382                                      | This work                                       |
| IrO <sub>2</sub>                                                                         | 0.1 M KOH      | 0.255                                                                | 73                                | 1.624                                    | 0.394                                      | This work                                       |
| Ba <sub>0.5</sub> Sr <sub>0.5</sub> Co <sub>0.8</sub> Fe <sub>0.2</sub> O <sub>3-δ</sub> | 0.1 M KOH      | 0.32                                                                 | 84                                | 1.72                                     | 0.49                                       | <i>ACS Appl. Mat. Interfaces</i> 2015, 7, 17663 |
| Ba <sub>0.5</sub> Sr <sub>0.5</sub> Co <sub>0.8</sub> Fe <sub>0.2</sub> O <sub>3-δ</sub> | 0.1 M KOH      | 0.232                                                                | 94                                | 1.74                                     | 0.51                                       | <i>Angew. Chem. Int. Ed.</i> 2015, 54, 3897     |
| SrSc <sub>0.025</sub> Nb <sub>0.025</sub> Co <sub>0.9</sub> O <sub>3-δ</sub>             | 0.1 M KOH      | 0.36                                                                 | -                                 | 1.63                                     | 0.40                                       | <i>Mater. Horiz.</i> 2015, 2, 495               |
| 80 nm LaCoO <sub>3</sub>                                                                 | 0.1 M KOH      | 0.25                                                                 | 69                                | 1.72                                     | 0.49                                       | <i>Nat. Commun.</i> 2016, 7, 11510              |
| CaCu <sub>3</sub> Fe <sub>4</sub> O <sub>12</sub>                                        | 0.1 M KOH      | 0.25                                                                 | 51                                | 1.615                                    | 0.385                                      | <i>Nat. Commun.</i> 2015, 6, 8249               |
| BaCo <sub>0.7</sub> Fe <sub>0.2</sub> Sn <sub>0.1</sub> O <sub>3-δ</sub>                 | 0.1 M KOH      | 0.232                                                                | 69                                | 1.655                                    | 0.425                                      | <i>Adv. Sic.</i> 2016, 3, 1500187               |
| SrNb <sub>0.1</sub> Co <sub>0.7</sub> Fe <sub>0.2</sub> O <sub>3-δ</sub>                 | 0.1 M KOH      | 0.232                                                                | 76                                | 1.73                                     | 0.5                                        | <i>Angew. Chem. Int. Ed.</i> 2015, 54, 3897     |

|                                                                                                                   |           |       |     |        |        |                                             |
|-------------------------------------------------------------------------------------------------------------------|-----------|-------|-----|--------|--------|---------------------------------------------|
| Ball milled<br>$\text{SrNb}_{0.1}\text{Co}_{0.7}\text{Fe}_{0.2}\text{O}_{3-\delta}$                               | 0.1 M KOH | 0.232 | 90  | 1.649  | 0.419  | <i>Angew. Chem. Int. Ed.</i> 2015, 54, 3897 |
| $\text{SrNb}_{0.1}\text{Co}_{0.7}\text{Fe}_{0.2}\text{O}_{3-\delta}$ nano-rod                                     | 0.1 M KOH | 0.232 | 61  | 1.62   | 0.389  | <i>Adv. Energy Mater.</i> 2017, 7, 1602122  |
| $\text{SrNb}_{0.1}\text{Co}_{0.7}\text{Fe}_{0.2}\text{O}_{3-\delta}$ nano-rod                                     | 1 M KOH   | 0.232 | 48  | 1.62   | 0.370  | <i>Adv. Energy Mater.</i> 2017, 7, 1602122  |
| $\text{Ba}_{0.5}\text{Sr}_{0.5}\text{Co}_{0.8}\text{Fe}_{0.2}\text{O}_{3-\delta}$ Solid-state reaction            | 0.1 M KOH | 0.232 | 80  | 1.625  | 0.395  | <i>Electrochim. Acta</i> 2016, 219, 553     |
| $\text{PrBa}_{0.5}\text{Sr}_{0.5}\text{Co}_{1.5}\text{Fe}_{0.5}\text{O}_{5+\delta}$ (nanofiber 20nm diameter)     | 0.1 M KOH | 0.202 | 52  | 1.58   | 0.35   | <i>Nat. Commun.</i> 2017, 8, 14586          |
| $\text{PrBa}_{0.5}\text{Sr}_{0.5}\text{Co}_{1.5}\text{Fe}_{0.5}\text{O}_{5+\delta}$ (nanofiber 83nm diameter)     | 0.1 M KOH | 0.202 | 55  | 1.61   | 0.38   | <i>Nat. Commun.</i> 2017, 8, 14586          |
| $\text{PrBa}_{0.5}\text{Sr}_{0.5}\text{Co}_{1.5}\text{Fe}_{0.5}\text{O}_{5+\delta}$                               | 0.1 M KOH | 0.202 | 67  | 1.716  | 0.486  | <i>Nat. Commun.</i> 2017, 8, 14586          |
| $\text{SrCo}_{0.95}\text{P}_{0.05}\text{O}_{3-\delta}$                                                            | 0.1 M KOH | 0.232 | 84  | 1.7113 | 0.4813 | <i>Adv. Funct. Mater.</i> 2016, 26, 5862    |
| $\text{La}_{0.9}\text{FeO}_{3-\delta}$                                                                            | 0.1 M KOH | 0.232 | 54  | 1.64   | 0.41   | <i>Chem. Mater.</i> 2016, 28, 1691          |
| 50 nm<br>$\text{La}_{0.7}(\text{Ba}_{0.5}\text{Sr}_{0.5})_{0.3}\text{Co}_{0.8}\text{Fe}_{0.2}\text{O}_{3-\delta}$ | 0.1 M KOH | 0.64  | 97  | 1.60   | 0.37   | <i>Energy Environ. Sci.</i> 2016, 9, 176    |
| BSCF treated at 950 °C under $\text{O}_2$ for 48 h                                                                | 0.1 M KOH | 0.64  | 129 | 1.78   | 0.55   | <i>Adv. Mater.</i> 2015, 27, 266            |
| $\text{Ba}_{0.5}\text{Sr}_{0.5}\text{Co}_{0.8}\text{Fe}_{0.2}\text{O}_{3-\delta}$                                 | 0.1 M KOH | 0.639 | 99  | 1.75   | 0.52   | <i>Adv. Energy Mater.</i> 2015, 5, 1501560  |
| $\text{IrO}_2$                                                                                                    | 0.1 M KOH | 0.202 | 59  | 1.624  | 0.394  | <i>Nat. Commun.</i> 2017, 8, 14586          |

|                     |           |       |     |       |        |                                             |
|---------------------|-----------|-------|-----|-------|--------|---------------------------------------------|
| IrO <sub>2</sub>    | 0.1 M KOH | 0.232 | 83  | 1.678 | 0.448  | <i>Angew. Chem. Int. Ed.</i> 2015, 54, 3897 |
| IrO <sub>2</sub>    | 0.1 M KOH | 0.639 | >99 | > 1.8 | > 0.57 | <i>Adv. Energy Mater.</i> 2015, 5, 1501560  |
| Co/CoP-HNC          | 1 M KOH   | 1     | -   | 1.68  | 0.45   | <i>Mater. Horiz.</i> , 2018, 5, 108         |
| CoMnP nanoparticles | 1 M KOH   | 0.28  | 95  | 1.56  | 0.33   | <i>J. Am. Chem. Soc.</i> 2016, 138, 4006    |
| CoP nanorods/C      | 1 M KOH   | 0.71  | -   | 1.57  | 0.34   | <i>Energy Environ. Sci.</i> 2015, 51, 11626 |
| CoP nanoparticles/C | 1 M KOH   | 0.71  | -   | 1.57  | 0.34   | <i>Energy Environ. Sci.</i> 2015, 51, 11626 |

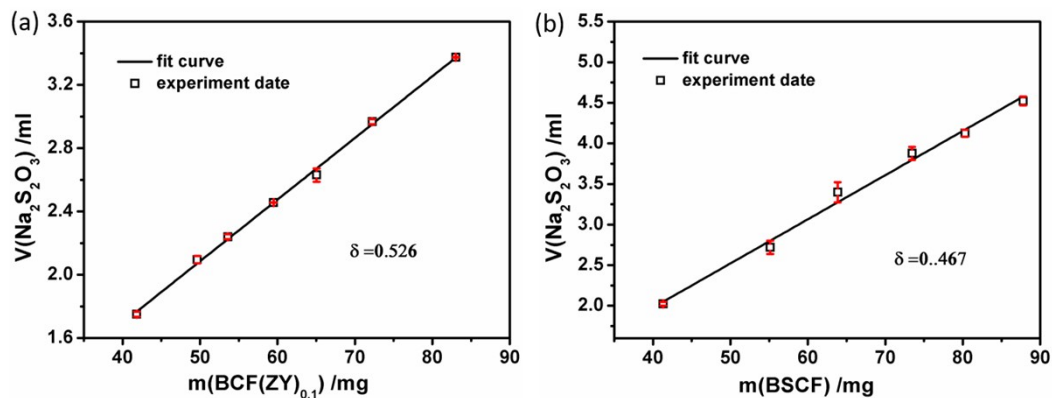

Figure S12. The oxygen vacancy concentration  $\delta$  of  $\text{BCF}(\text{ZY})_{0.1}$  and BSCF obtained reliably through parallel iodometric experiment dates with good linear relation.



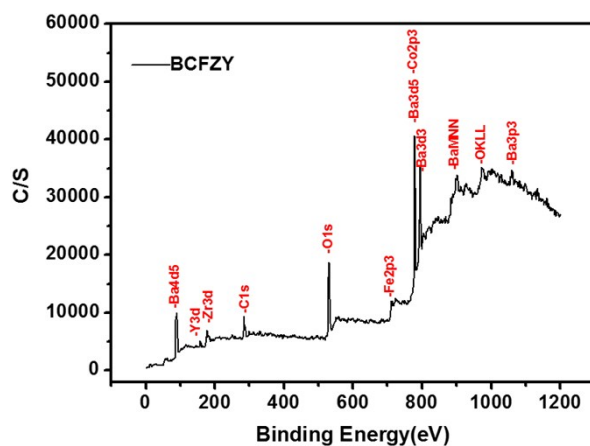

Figure S13. Low resolution XPS spectra of BCF(ZY)<sub>0.1</sub> collected at room temperature.

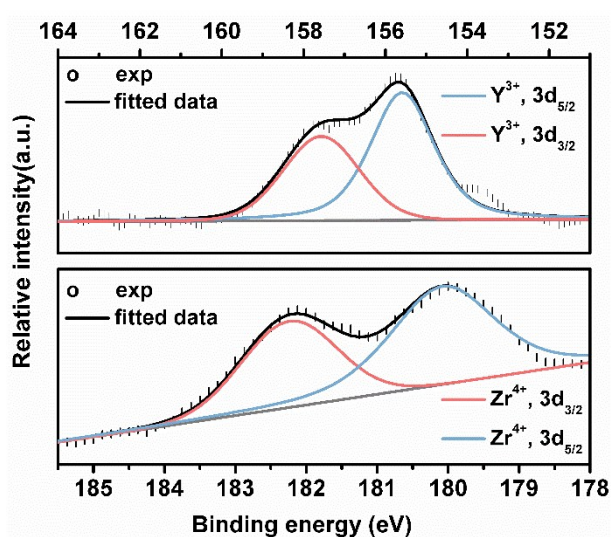

Figure S14. High resolution XPS spectra of Y 3d and Zr 3d core levels of BCF(ZY)<sub>0.1</sub>.

Table S3. Percentage contribution of the four oxygen species of BCF(ZY)<sub>0.075</sub>, BCF(ZY)<sub>0.1</sub> and BSCF from the deconvoluted results of O 1s XPS spectra.

|                          | O I (O <sup>2-</sup> ) | O II (O <sup>2-</sup> <sub>2</sub> /O <sup>-</sup> ) | O III (O <sub>2</sub> ) | O IV (molecular water adsorbed on the surface) |
|--------------------------|------------------------|------------------------------------------------------|-------------------------|------------------------------------------------|
| BCF(ZY) <sub>0.1</sub>   | 26.92%                 | 28.25%                                               | 40.77%                  | 4.05%                                          |
| BCF(ZY) <sub>0.075</sub> | 28.59%                 | 23.78%                                               | 35.43%                  | 12.20%                                         |
| BSCF                     | 6.85%                  | 21.15%                                               | 52.19%                  | 19.81%                                         |



O 1s XPS spectra can be deconvoluted into four different characteristic peaks, i.e., lattice oxygen species ( $\sim 528.96$  eV for  $O^{2-}$ ), reactive oxygen species ( $\sim 530.67$  eV for  $O^{2-}/O^-$ ), the surface adsorbed oxygen ( $\sim 531.46$  eV for  $O_2$ ), and adsorbed molecular water or carbonates ( $\sim 532.87$  eV for  $H_2O$ ).

Table S4. The ratios of  $Co^{3+}$  (3  $d^6$ ) /  $Co^{2+}$  (3  $d^7$ ) and  $Fe^{3+}$  (3  $d^5$ ) /  $Fe^{2+}$  (3  $d^6$ ) in  $BCF(ZY)_{0.1}$  calculated as per the respective area intensity of characteristic peaks from the deconvoluted results of high resolution XPS spectra.

|                         | $Co^{2+}$ | $Co^{3+}$ | $Fe^{2+}$ | $Fe^{3+}$ |
|-------------------------|-----------|-----------|-----------|-----------|
| Percentage              |           |           |           |           |
| (of the Co/Fe in BCFZY) | 15.41%    | 84.59%    | 25.35%    | 74.65%    |

Table S5. Fitted Mössbauer parameters of  $BCF(ZY)_{0.1}$ .

| spectrum  | Isomer shift<br>(mm/s) | Quadrupole<br>splitting<br>(mm/s) | FWHM<br>(mm/s) | Area Ratio<br>(%) |
|-----------|------------------------|-----------------------------------|----------------|-------------------|
| Doublet 1 | 0.49(1)                | 0.82(1)                           | 0.33(3)        | 25.3              |
| Doublet2  | 0.214(9)               | 0.859(6)                          | 0.49(2)        | 74.7              |

Table S6. Bader charges analysis of fully oxidized and relaxed structure with a large cell  $\text{Ba}_{20}\text{Co}_8\text{Fe}_8\text{Zr}_2\text{Y}_2\text{O}_{60}$ . (here,  $q$ =valence electrons-charge (valence electrons: 6 for O, 8 for Fe, 9 for Co, 11 for Y, 12 for Zr and 10 for Ba)).

|     | X        | Y        | Z        | Charge   | Atom Charge<br>(q) | Avg. charge transfer |
|-----|----------|----------|----------|----------|--------------------|----------------------|
| O1  | 7.878564 | 1.994766 | 2.013621 | 7.044751 | -1.044751          | -1.065035828         |
| O2  | 1.988081 | 0.221619 | 1.972395 | 7.002184 | -1.0021843         |                      |
| O3  | 1.988081 | 1.994766 | 20.11325 | 7.0041   | -1.0041003         |                      |
| O4  | 4.049919 | 1.994766 | 2.013621 | 7.044751 | -1.044751          |                      |
| O5  | 5.964242 | 0.098286 | 1.994666 | 7.175648 | -1.175648          |                      |
| O6  | 5.964242 | 1.994766 | 0.100234 | 7.135085 | -1.1350851         |                      |
| O7  | 0.107587 | 5.984298 | 1.941141 | 7.210255 | -1.2102545         |                      |
| O8  | 1.988081 | 3.767914 | 1.972395 | 7.002184 | -1.0021843         |                      |
| O9  | 1.988081 | 5.984298 | 0.096391 | 7.038965 | -1.0389645         |                      |
| O10 | 3.868574 | 5.984298 | 1.941141 | 7.210255 | -1.2102545         |                      |
| O11 | 5.964242 | 3.891246 | 1.994666 | 7.175648 | -1.175648          |                      |
| O12 | 5.964242 | 5.984298 | 20.05527 | 7.184543 | -1.1845425         |                      |
| O13 | 7.868576 | 1.994766 | 6.140591 | 7.00263  | -1.0026296         |                      |
| O14 | 1.988081 | 0.066857 | 6.158777 | 7.060328 | -1.0603278         |                      |
| O15 | 1.988081 | 1.994766 | 4.342387 | 6.994706 | -0.9947059         |                      |
| O16 | 4.059907 | 1.994766 | 6.140591 | 7.00263  | -1.0026296         |                      |
| O17 | 5.964242 | 0.185426 | 6.119492 | 7.094637 | -1.0946366         |                      |
| O18 | 5.964242 | 1.994766 | 4.00855  | 6.97746  | -0.9774602         |                      |
| O19 | 0.22793  | 5.984298 | 6.113889 | 7.125415 | -1.1254148         |                      |
| O20 | 1.988081 | 3.922675 | 6.158777 | 7.060328 | -1.0603278         |                      |
| O21 | 1.988081 | 5.984298 | 3.754759 | 6.999855 | -0.999855          |                      |
| O22 | 3.748232 | 5.984298 | 6.113889 | 7.125415 | -1.1254148         |                      |
| O23 | 5.964242 | 3.804107 | 6.119492 | 7.094637 | -1.0946366         |                      |
| O24 | 5.964242 | 5.984298 | 3.964431 | 7.326304 | -1.3263035         |                      |
| O25 | 7.891956 | 1.994766 | 10.22205 | 7.19201  | -1.1920104         |                      |
| O26 | 1.988081 | 7.887297 | 10.18226 | 7.204938 | -1.2049381         |                      |
| O27 | 1.988081 | 1.994766 | 8.082298 | 7.153632 | -1.1536323         |                      |
| O28 | 4.036527 | 1.994766 | 10.22205 | 7.19201  | -1.1920104         |                      |
| O29 | 5.964242 | 7.823345 | 10.23408 | 6.95415  | -0.9541503         |                      |
| O30 | 5.964242 | 1.994766 | 8.507084 | 6.94663  | -0.9466303         |                      |
| O31 | 0.04167  | 5.984298 | 10.18003 | 6.966976 | -0.9669758         |                      |
| O32 | 1.988081 | 4.081299 | 10.18226 | 7.204938 | -1.2049381         |                      |
| O33 | 1.988081 | 5.984298 | 8.254608 | 6.969285 | -0.9692851         |                      |
| O34 | 3.934491 | 5.984298 | 10.18003 | 6.966976 | -0.9669758         |                      |
| O35 | 5.964242 | 4.145251 | 10.23408 | 6.95415  | -0.9541503         |                      |
| O36 | 5.964242 | 5.984298 | 8.33439  | 7.147114 | -1.147114          |                      |
| O37 | 7.88596  | 1.994766 | 14.128   | 6.987626 | -0.987626          |                      |
| O38 | 1.988081 | 7.891111 | 14.15783 | 7.046092 | -1.0460918         |                      |
| O39 | 1.988081 | 1.994766 | 12.3038  | 7.152569 | -1.1525687         |                      |
| O40 | 4.042523 | 1.994766 | 14.128   | 6.987626 | -0.987626          |                      |

|      |          |          |          |          |            |            |
|------|----------|----------|----------|----------|------------|------------|
| O41  | 5.964242 | 0.085544 | 14.12959 | 7.063242 | -1.0632418 |            |
| O42  | 5.964242 | 1.994766 | 12.08771 | 6.998138 | -0.998138  |            |
| O43  | 0.017257 | 5.984298 | 14.1582  | 7.034304 | -1.0343044 |            |
| O44  | 1.988081 | 4.077485 | 14.15783 | 7.046092 | -1.0460918 |            |
| O45  | 1.988081 | 5.984298 | 12.08955 | 6.955697 | -0.955697  |            |
| O46  | 3.958905 | 5.984298 | 14.1582  | 7.034304 | -1.0343044 |            |
| O47  | 5.964242 | 3.903989 | 14.12959 | 7.063242 | -1.0632418 |            |
| O48  | 5.964242 | 5.984298 | 12.20696 | 7.045377 | -1.0453774 |            |
| O49  | 0.188478 | 1.994766 | 18.09876 | 7.101422 | -1.1014221 |            |
| O50  | 1.988081 | 7.902992 | 18.13119 | 7.035518 | -1.0355175 |            |
| O51  | 1.988081 | 1.994766 | 16.07092 | 6.99681  | -0.9968098 |            |
| O52  | 3.787683 | 1.994766 | 18.09876 | 7.101422 | -1.1014221 |            |
| O53  | 5.964242 | 7.7887   | 18.12265 | 7.066652 | -1.0666524 |            |
| O54  | 5.964242 | 1.994766 | 15.97004 | 7.090721 | -1.0907211 |            |
| O55  | 0.097313 | 5.984298 | 18.14636 | 7.016247 | -1.0162467 |            |
| O56  | 1.988081 | 4.065604 | 18.13119 | 7.035518 | -1.0355175 |            |
| O57  | 1.988081 | 5.984298 | 16.16443 | 6.970914 | -0.9709136 |            |
| O58  | 3.878848 | 5.984298 | 18.14636 | 7.016247 | -1.0162467 |            |
| O59  | 5.964242 | 4.179897 | 18.12265 | 7.066652 | -1.0666524 |            |
| O60  | 5.964242 | 5.984298 | 16.1174  | 7.044198 | -1.0441976 |            |
| Fe1  | 5.964242 | 1.994766 | 1.954128 | 6.310792 | 1.6892085  | 1.53738875 |
| Fe2  | 1.988081 | 5.984298 | 1.955605 | 6.435247 | 1.5647531  |            |
| Fe3  | 1.988081 | 1.994766 | 6.144414 | 6.42862  | 1.5713805  |            |
| Fe4  | 5.964242 | 1.994766 | 5.903226 | 6.545956 | 1.454044   |            |
| Fe5  | 1.988081 | 5.984298 | 10.2112  | 6.539769 | 1.4602308  |            |
| Fe6  | 5.964242 | 5.984298 | 10.20896 | 6.49447  | 1.50553    |            |
| Fe7  | 5.964242 | 1.994766 | 14.16327 | 6.469455 | 1.5305453  |            |
| Fe8  | 1.988081 | 5.984298 | 18.01226 | 6.476582 | 1.5234178  |            |
| Co1  | 1.988081 | 1.994766 | 1.792863 | 7.660261 | 1.339739   | 1.37668935 |
| Co2  | 1.988081 | 5.984298 | 6.320506 | 7.617704 | 1.3822958  |            |
| Co3  | 5.964242 | 1.994766 | 10.25959 | 7.577019 | 1.4229807  |            |
| Co4  | 1.988081 | 1.994766 | 14.18298 | 7.607932 | 1.3920678  |            |
| Co5  | 1.988081 | 5.984298 | 14.12446 | 7.648983 | 1.3510174  |            |
| Co6  | 5.964242 | 5.984298 | 14.16714 | 7.648455 | 1.3515453  |            |
| Co7  | 1.988081 | 1.994766 | 18.05023 | 7.647577 | 1.3524231  |            |
| Co8  | 5.964242 | 5.984298 | 18.09868 | 7.578554 | 1.4214457  |            |
| Y1   | 5.964242 | 5.984298 | 6.117712 | 8.888231 | 2.1117694  | 2.0746143  |
| Y2   | 5.964242 | 1.994766 | 18.14771 | 8.962541 | 2.0374592  |            |
| Zr1  | 5.964242 | 5.984298 | 1.931896 | 9.508315 | 2.491685   | 2.4617265  |
| Zr2  | 1.988081 | 1.994766 | 10.21167 | 9.568232 | 2.431768   |            |
| Ba1  | 0.071253 | 7.96534  | 20.13332 | 8.427996 | 1.5720039  | 1.57584484 |
| Ba2  | 3.904908 | 7.96534  | 20.13332 | 8.427996 | 1.5720039  |            |
| Ba3  | 0.071253 | 4.003256 | 20.13332 | 8.427996 | 1.5720039  |            |
| Ba4  | 3.904908 | 4.003256 | 20.13332 | 8.427996 | 1.5720039  |            |
| Ba5  | 0.079245 | 0.054306 | 4.039946 | 8.425254 | 1.5747458  |            |
| Ba6  | 3.896916 | 0.054306 | 4.039946 | 8.425254 | 1.5747458  |            |
| Ba7  | 0.079245 | 3.935227 | 4.039946 | 8.425254 | 1.5747458  |            |
| Ba8  | 3.896916 | 3.935227 | 4.039946 | 8.425254 | 1.5747458  |            |
| Ba9  | 7.936489 | 0.020187 | 8.184677 | 8.426642 | 1.5733585  |            |
| Ba10 | 3.991994 | 0.020187 | 8.184677 | 8.426642 | 1.5733585  |            |

|                                   |          |          |          |          |           |
|-----------------------------------|----------|----------|----------|----------|-----------|
| Ba11                              | 7.936489 | 3.969345 | 8.184677 | 8.426642 | 1.5733585 |
| Ba12                              | 3.991994 | 3.969345 | 8.184677 | 8.426642 | 1.5733585 |
| Ba13                              | 7.929722 | 7.93869  | 12.20712 | 8.416095 | 1.5839048 |
| Ba14                              | 3.998762 | 7.93869  | 12.20712 | 8.416095 | 1.5839048 |
| Ba15                              | 7.929722 | 4.029906 | 12.20712 | 8.416095 | 1.5839048 |
| Ba16                              | 3.998762 | 4.029906 | 12.20712 | 8.416095 | 1.5839048 |
| Ba17                              | 0.023682 | 7.94094  | 16.09157 | 8.424789 | 1.5752112 |
| Ba18                              | 3.952479 | 7.94094  | 16.09157 | 8.424789 | 1.5752112 |
| Ba19                              | 0.023682 | 4.027656 | 16.09157 | 8.424789 | 1.5752112 |
| Ba20                              | 3.952479 | 4.027656 | 16.09157 | 8.424789 | 1.5752112 |
| <hr/>                             |          |          |          |          |           |
| NUMBER OF ELECTRONS: 741.9999     |          |          |          |          |           |
| SUM OF THE ATOMS CHARGE: 5.35E-05 |          |          |          |          |           |
| <hr/>                             |          |          |          |          |           |

- [1] J. P. Perdew, K. Burke, M. Ernzerhof, *Physical Review Letters* 1997, 78, 1396.
- [2] G. Kresse, J. Furthmuller, *Computational Materials Science* 1996, 6, 15.
- [3] G. Kresse, D. Joubert, *Physical Review B* 1999, 59, 1758.
- [4] P. E. Blochl, *Physical Review B* 1994, 50, 17953.
- [5] M. R. Li, M. W. Zhao, F. Li, W. Zhou, V. K. Peterson, X. Y. Xu, Z. P. Shao, I. Gentle, Z. H. Zhu, *Nature Communications* 2017, 8.
